# Supplementary material for: SCRaMbLE generates designed combinatorial stochastic diversity in synthetic chromosomes
Source: Genome Res. 2016 Jan;26(1):36–49. doi: 10.1101/gr.193433.115 (PMC4691749; doi:10.1101/gr.193433.115)
Supplement: Supplemental Material [file supp_gr.193433.115_TableS1.xlsx]

## Sheet: Sheet1
Strain ID	Synthetic chromosome	Phenotype	SCRaMbLEing (Y/N)	Integrate CRE-EBD into the HO locus (Y/N)					Total # of reads	Total # of reads after quality control	Total # of reads mapping to WT chromosomes	Total # of reads mapping to syn chromosome without bisection / trisection	Total # of reads mapping to syn chromosome with bisection / trisection	Total # of reads, other	Maximal read depth supporting a putative ectopic recombination	Average sequencing depth		Total # of reads containing loxP site	# including sequence mapping on non-syn chromosome (should be 0)	# mapping to parent sequence	# consistent with solution		# inconsistent with solution		Maximal read depth supporting a putative off-target recombination	Total # of recombinations	# of new junctions that are CDS-UTR	# of new junctions that are CDS-CDS	# of new junctions that are UTR-UTR	# of new junctions that involve non-CDS or non-UTR sequence (when the loxP site wasn't in a 3' UTR)	# of segments observed at copy number 1	# of segments observed at copy number 2 or more	# of segments deleted	# of reconstructions	# of 10kb reads	# mapping to syn chromosome parent sequence	# mapping to syn chromosome with recombination, consistent with solution (loxp)	# mapping to syn chromosome but inconsistent with solution(loxp)	Final # of possible unique reconstruction	solutions	# of Deletion		# of Inversion		# of Tandem Duplication		# of Inverted Duplication		# of Complex
					Slow Growth	Round	Tube	Colony								the non-synthetic regions	SYN chromosome				mapping to parent	not mapping to parent(# not mapping to parental sequence but consistent with the solution)	mapping to parent	not mapping to parent																	Events	Junctions	Events	Junctions	Events	Junctions	Events	Junctions	Events
JS94	9R	Lys-	N	N	N	2	2	1	7082820	3610832	3573361	19942	70	17459	8	29.6108	19.9378	797	0	796	796	0	0	1	0	0	0	0	0	0	43	0	0	1	-	-	-	-	1	1-44	-	-	-	-	-	-	-	-	-
JS96	9R	-	N	N	N	2	2		6418540	3086900	3050608	17550	58	18684	8	25.279	17.5427	333	0	333	333	0	0	0	0	0	0	0	0	0	43	0	0	1	-	-	-	-	1	1-44	-	-	-	-	-	-	-	-	-
JS274	9R	Met- Lys-	N	Y	N	2	2	1	6420176	3101298	3050584	17736	205	32773	6	25.2788	17.8745	657	0	601	600	32	1	24	1	3	1	1	1	0	41	0	2	1	-	-	-	-	1	1,2,3,4,5,6,7,8,9,10,11,-18,-17,-16,-13,-12,19,20,21,22,23,24,25,26,27,28,29,30,31,32,33,34,35,36,37,38,39,40,41,42,43,44	1	1	1	2	0	0	0	0	0
JS571	9R	Met- Lys-	Y	N	N	1	1		5909460	2933076	2901252	14746	153	16925	7	24.0414	14.8438	439	0	350	350	87	0	2	1	8	1	3	2	2	33	0	10	1	-	-	-	-	1	1,2,3,4,5,6,-25,15,16,17,18,19,20,21,22,23,24,12,-11,-10,-9,-8,-7,26,27,28,29,30,36,37,38,-43,-42,44	3	3	3	6	0	0	0	0	1
JS601	9R	Met- Lys-	Y	N	N	2	2	4	8691370	4387242	4337550	21404	132	28156	5	35.9433	21.4562	785	0	737	737	46	0	2	0	3	1	2	0	0	33	1	9	1	-	-	-	-	1	1,2,3,4,5,6,7,8,9,10,11,12,18,16,17,18,19,20,21,22,23,24,25,26,27,28,29,30,31,38,39,40,41,42,43,44	2	2	0	0	1	4	0	0	0
JS605	9R	Met-	Y	N	N	2	2	31	7071434	3601196	3561556	20138	103	19399	4	29.513	20.166	747	0	708	708	37	0	2	0	2	1	0	0	1	40	0	3	1	-	-	-	-	1	1,2,3,4,5,6,7,9,10,11,12,13,16,17,18,19,20,21,22,23,24,25,26,27,28,29,30,31,32,33,34,35,36,37,38,39,40,41,42,43,44	2	2	0	0	0	0	0	0	0
JS606	9R	Met-	Y	N	Y	3	1	1	8721780	4439230	4324954	83007	1027	30242	3	35.8389	83.7226	3568	0	2905	2905	649	0	14	0	19	16	1	2	0	34	4	5	1	-	-	-	-	1	1,2,3,4,5,6,7,8,9,10,12,13,16,17,19,20,21,-22,23,25,26,27,24,25,26,27,24,25,26,27,24,25,26,27,24,25,26,27,24,25,26,27,24,25,26,27,24,25,26,27,24,25,26,27,24,25,26,27,24,25,26,27,28,29,30,32,33,34,35,36,37,38,-39,40,41,42,43,44	4	4	2	4	1	3	0	0	0
JS608	9R	Met- Lys-	Y	N	N	3	1	13	8640494	4290258	4225767	22203	248	42040	4	35.017	22.3678	814	0	717	717	89	0	8	0	5	3	1	1	0	37	0	6	1	-	-	-	-	1	1,2,3,4,5,6,7,8,9,10,11,12,13,16,17,18,19,20,21,22,23,24,25,26,27,-37,-36,-31,-30,-29,28,38,39,40,41,42,43,44	2	2	1	2	0	0	0	0	1
JS610	9R	Met-	Y	N	N	3	1	21	6551588	3256164	3220011	18371	127	17655	3	26.6828	18.4294	725	0	679	679	41	0	5	1	3	2	1	0	0	39	0	4	1	-	-	-	-	1	1,2,3,4,5,6,7,8,9,10,11,12,13,16,17,18,19,20,21,22,23,24,25,26,27,29,30,31,32,33,34,36,37,38,39,40,41,42,43,44	3	3	0	0	0	0	0	0	0
JS611	9R	Met-	Y	N	N	3	1	22	10857636	5574330	5503208	30964	211	39947	3	45.6026	31.0595	1186	0	1142	1142	41	0	3	0	2	0	1	1	0	41	0	2	1	-	-	-	-	1	1,2,3,4,5,6,7,8,9,10,11,12,13,-35,-34,-33,-32,-31,-30,-29,-28,-27,-26,-25,-24,-23,-22,-21,-20,-19,-18,-17,-16,36,37,38,39,40,41,42,43,44	1	1	1	2	0	0	0	0	0
JS612	9R	Met-	Y	N	Y	3	1	27	5645404	2719236	2687189	14086	124	17837	3	22.2675	14.1573	476	0	423	423	50	0	3	0	5	1	2	2	0	39	0	4	1	-	-	-	-	1	1,2,3,4,-6,-5,7,8,9,10,12,15,16,17,18,19,20,21,22,23,24,25,26,27,28,29,30,31,32,33,34,36,37,38,39,40,41,42,43,44	3	3	1	2	0	0	0	0	0
JS618	9R	Met- Lys-	Y	N	N	3	2	24	6775396	3203816	3172589	13845	98	17284	3	26.2898	13.8913	516	0	462	462	53	0	1	0	4	0	2	2	0	31	0	12	1	-	-	-	-	1	1,2,3,4,5,6,7,8,9,10,11,12,13,19,20,21,22,23,24,25,26,27,-28,29,30,38,39,40,41,42,43,44	2	2	1	2	0	0	0	0	0
JS621	9R	Met- Lys-	Y	N	N	3	3	11	6620858	3139326	3108200	16714	107	14305	3	25.7562	16.7587	572	0	534	534	36	0	2	0	3	2	0	0	1	30	4	9	1	-	-	-	-	1	1,2,3,4,5,6,7,8,9,10,11,8,9,10,11,12,15,16,17,18,19,20,21,22,23,24,25,26,27,28,29,30,31,39,40,41,42,43,44	2	2	0	0	1	3	0	0	0
JS622	9R	Met-	Y	N	N	3	3	13	8560768	4215798	4137561	20515	301	57421	6	34.2861	20.7389	728	0	642	642	81	0	5	0	6	1	3	2	0	36	0	7	1	-	-	-	-	1	1,2,3,4,5,6,7,8,9,10,11,-12,19,20,21,22,23,24,25,26,27,-41,-40,-39,-38,-37,-36,-34,-33,-32,-31,-30,-29,28,42,43,44	2	2	2	4	0	0	0	0	1
JS623	9R	Met-	Y	N	N	3	4	3	9551986	5019292	4956238	27087	202	35765	4	41.0701	27.1879	954	0	895	895	59	0	0	0	4	2	1	1	0	40	0	3	1	-	-	-	-	1	1,2,3,4,5,6,-9,-8,-7,10,11,12,15,16,17,18,19,20,21,22,23,24,25,26,27,29,30,31,32,33,34,35,36,37,38,39,40,41,42,43,44	2	2	1	2	0	0	0	0	0
JS624	9R	Met- Lys-	Y	N	N	3	4	5	7479296	3836890	3790781	19479	188	26442	3	31.4125	19.5941	672	0	567	567	102	0	3	0	6	1	3	2	0	36	0	7	1	-	-	-	-	1	1,2,3,4,5,6,7,8,9,10,11,12,16,17,18,19,20,21,-24,-23,-22,25,26,27,-28,29,30,31,36,37,38,39,40,41,42,43,44	2	2	2	4	0	0	0	0	0
JS625	9R	Met-	Y	N	N	3	4	7	8617764	4380250	4321079	24115	143	34913	4	35.8068	24.1681	919	0	904	904	12	0	3	0	1	1	0	0	0	41	0	2	1	-	-	-	-	1	1,2,3,4,5,6,7,8,9,10,11,12,13,16,17,18,19,20,21,22,23,24,25,26,27,28,29,30,31,32,33,34,35,36,37,38,39,40,41,42,43,44	1	1	0	0	0	0	0	0	0
JS626	9R	Met-	Y	N	N	3	4	14	6450560	2718732	2696254	12021	81	10376	3	22.3426	12.0571	427	0	387	387	39	0	1	0	5	1	2	2	0	39	0	4	1	-	-	-	-	1	1,2,-3,4,5,6,7,8,9,10,11,12,13,18,19,20,21,22,23,24,25,26,27,-38,-37,-36,-35,-34,-33,-32,-31,-30,-29,-28,39,40,41,42,43,44	1	1	2	4	0	0	0	0	0
JS627	9R	Met-	Y	N	N	3	4	16	9385906	4945528	4873778	24638	225	46887	4	40.3868	24.7709	887	0	838	838	39	0	10	0	2	1	1	0	0	40	0	3	1	-	-	-	-	1	1,2,3,4,5,6,7,8,9,10,11,12,13,16,17,18,19,20,22,23,24,25,26,27,28,29,30,31,32,33,34,35,36,37,38,39,40,41,42,43,44	2	2	0	0	0	0	0	0	0
JS629	9R	Met-	Y	N	N	3	4	20	10967344	8018164	7918608	37662	264	61630	6	65.6179	37.7854	1273	0	1212	1212	59	0	2	0	2	1	0	1	0	35	0	8	1	-	-	-	-	1	1,2,3,4,5,6,7,8,9,10,11,12,13,19,20,21,22,23,24,28,29,30,31,32,33,34,35,36,37,38,39,40,41,42,43,44	2	2	0	0	0	0	0	0	0
JS708	9R	Lys-	Y	N	N	2	1	32	7060260	3382250	3344463	16337	103	21347	3	27.714	16.3791	567	0	543	543	22	0	2	0	2	1	1	0	0	36	0	7	1	-	-	-	-	1	1,2,3,4,5,6,7,8,9,10,11,12,13,14,16,17,18,19,20,21,22,23,24,25,26,27,28,29,36,37,38,39,40,41,42,43,44	2	2	0	0	0	0	0	0	0
JS710	9R	Lys-	Y	N	N	2	1	38	7421738	3413052	3309077	68483	1145	34347	4	27.4208	69.3699	2149	0	1522	1522	610	0	17	0	44	10	17	6	11	1	35	7	-	2667118	51487	310	212	1	1,2,3,4,-7,-27,-26,-25,-24,-23,-22,-21,-20,-19,-18,-17,-16,-14,25,26,27,28,29,30,7,-6,-5,-4,-3,-1,-44,-41,-40,39,-38,-37,8,9,10,11,14,37,38,39,40,41,42,43,44,1,3,4,5,6,-7,-30,-29,-28,-27,-26,-25,14,16,17,18,19,20,21,22,23,24,-13,-12,16,17,18,14,-10,9,-8,37,38,39,-38,-37,8,9,10,11,14,37,38,39,40,41,42,43,44,1,3,4,5,6,-7,-30,-29,28,-27,-26,-25,14,16,17,18,19,20,22,23,24,-13,-12,16,17,18,14,-10,9,-8…	2	2	5	13	4	7	0	3	5
JS713	9R	Lys-	Y	N	N	2	1	42	5827140	4217230	4175916	16297	177	24840	3	34.6039	16.4129	503	0	429	429	74	0	0	0	4	0	0	2	2	27	0	16	1	-	-	-	-	1	1,2,3,4,5,6,-43,-42,-41,-40,-24,-23,-22,-21,-20,-19,-18,-17,-16,-15,-14,-13,-12,-10,-9,-8,-7,44	2	2	1	2	0	0	0	0	0
JS714	9R	Lys-	Y	N	N	2	2	20	5380014	3888104	3844348	21427	102	22227	2	31.8564	21.4492	691	0	669	669	22	0	0	0	1	1	0	0	0	37	0	6	1	-	-	-	-	1	1,2,3,4,5,6,7,8,9,10,11,12,13,14,15,16,17,18,19,20,21,22,23,24,25,26,27,28,29,36,37,38,39,40,41,42,43,44	1	1	0	0	0	0	0	0	0
JS715	9R	Lys-	Y	N	N	2	2	21	6213960	4560546	4510934	25984	243	23385	4	37.3801	26.1298	786	0	667	667	118	0	1	0	6	1	2	1	2	35	0	8	1	-	-	-	-	1	1,2,3,4,5,6,-7,8,9,10,12,14,15,16,17,18,19,20,21,22,23,24,25,26,27,29,30,36,37,38,39,40,41,42,43,44	4	4	1	2	0	0	0	0	0
JS716	9R	Lys-	Y	N	N	2	2	22	5569698	3906114	3856376	18453	167	31118	4	31.956	18.551	595	0	582	582	10	0	3	0	1	1	0	0	0	32	0	11	1	-	-	-	-	1	1,2,3,4,5,6,7,8,9,10,11,12,13,14,15,16,17,18,19,20,21,22,23,24,25,26,27,39,40,41,42,43,44	1	1	0	0	0	0	0	0	0
JS717	9R	Lys-	Y	N	N	2	2	23	6474950	4762706	4701344	26622	162	34578	4	38.9579	26.6847	821	0	799	799	18	0	4	1	1	0	1	0	0	38	0	5	1	-	-	-	-	1	1,2,3,4,5,6,7,8,9,10,11,12,13,14,15,16,17,18,19,20,21,22,23,24,25,26,27,28,29,30,36,37,38,39,40,41,42,43,44	1	1	0	0	0	0	0	0	0
JS718	9R	Lys-	Y	N	N	2	2	24	5744288	4220010	4175512	20059	90	24349	3	34.6006	20.0743	614	0	595	595	16	0	3	0	1	1	0	0	0	34	0	9	1	-	-	-	-	1	1,2,3,4,5,6,7,8,9,10,11,12,13,14,15,16,17,18,19,20,21,22,23,24,25,26,27,28,29,30,40,41,42,43,44	1	1	0	0	0	0	0	0	0
JS719	9R	Lys-	Y	N	N	2	2	25	5692788	3972680	3908072	19669	266	44673	2	32.3844	19.8611	586	0	493	493	92	0	1	0	6	2	3	1	0	34	0	9	1	-	-	-	-	1	1,2,3,4,5,6,7,8,9,10,12,14,15,16,17,-18,19,20,21,22,23,24,25,26,27,28,29,30,36,37,38,39,42,43,44	4	4	1	2	0	0	0	0	0
JS722	9R	Lys-	Y	N	N	3	1	6	6733404	3169498	3124251	16861	220	28166	5	25.8892	17.0177	592	0	490	490	96	0	6	0	8	2	4	2	0	35	2	6	1	-	-	-	-	1	1,2,3,4,5,6,36,37,-31,-30,-29,28,26,27,-25,-24,-23,-22,-20,-19,-18,-17,-16,-14,-13,-12,-11,-10,-9,-8,-7,36,37,38,39,40,41,42,43,44	3	3	1	2	1	4	0	0	1
JS724	9R	Lys-	Y	N	N	3	1	8	7085138	5162002	5097572	33242	305	30883	4	42.2413	33.4227	1055	0	885	885	165	0	5	0	8	1	3	3	1	24	9	10	1	-	-	-	-	1	1,2,3,4,5,6,7,9,10,11,12,13,14,16,17,18,19,20,21,-24,-23,-22,25,26,27,19,20,21,-24,-23,-22,25,26,27,36,37,38,39,40,41,42,43,44	3	3	1	2	1	3	0	0	0
JS725	9R	Lys-	Y	N	N	3	1	15	6901316	5140724	5083385	25666	176	31497	4	42.1237	25.7462	785	0	733	733	49	0	3	0	2	0	1	0	1	35	0	8	1	-	-	-	-	1	1,2,3,4,5,6,7,8,9,10,11,12,13,14,15,16,17,18,19,20,21,22,23,24,25,26,27,28,29,37,38,39,41,42,43,44	2	2	0	0	0	0	0	0	0
JS726	9R	Lys-	Y	N	N	3	1	16	5153084	3672818	3626552	20724	220	25322	5	30.0516	20.8664	643	0	541	541	99	0	3	0	7	5	2	0	0	36	0	7	1	-	-	-	-	1	1,2,3,4,5,6,7,8,9,10,-12,11,-13,14,15,16,17,18,19,20,22,23,24,25,26,27,29,30,36,37,38,39,40,41,42,43,44	3	3	2	4	0	0	0	0	0
JS727	9R	Lys-	Y	N	N	3	1	17	6735602	4842078	4772244	25891	283	43660	3	39.5454	26.077	788	0	673	673	108	0	7	1	6	5	1	0	0	37	0	6	1	-	-	-	-	1	1,2,3,4,5,6,7,8,9,10,-12,11,-13,14,15,16,17,18,19,20,21,22,23,24,25,26,27,29,30,36,37,38,39,40,41,42,43,44	2	2	2	4	0	0	0	0	0
JS728	9R	Lys-	Y	N	N	3	1	18	8102828	5787070	5717527	23501	220	45822	3	47.3785	23.6331	717	0	635	635	78	0	4	0	3	0	1	0	2	31	0	12	1	-	-	-	-	1	1,2,3,4,5,6,-43,-42,-41,-40,-39,-26,-25,-24,-23,-22,-21,-20,-19,-18,-17,-16,-15,-14,-13,-12,-11,-10,-9,-8,-7,44	1	1	1	2	0	0	0	0	0
JS729	9R	Lys-	Y	N	N	3	1	19	6601702	4832462	4754997	48233	417	28815	5	39.4025	48.4697	1413	0	1228	1228	183	0	2	0	7	4	2	1	0	10	22	11	1	-	-	-	-	1	1,-10,14,15,16,17,18,19,20,21,22,23,24,25,36,37,38,39,40,41,42,43,44,1,-10,-9,-8,-7,2,3,4,5,6,12,13,14,15,16,17,18,19,20,21,22,23,24,25,36,37,38,39,40,41,42,43,44	2	2	2	3	1	3	0	0	1
JS730	9R	Lys-	Y	N	N	3	1	20	6313650	4768908	4719380	23823	138	25567	3	39.1074	23.8722	760	0	710	709	49	1	1	0	2	0	0	2	0	34	0	9	1	-	-	-	-	1	1,2,3,4,5,6,7,8,9,10,11,12,13,14,15,16,17,18,19,20,21,22,23,24,25,26,27,35,36,37,40,41,42,43,44	2	2	0	0	0	0	0	0	0
JS733	9R	Lys-	Y	N	Y	3	4	6	8843380	6574286	6499275	31530	225	43256	4	53.8565	31.6373	976	0	907	907	66	0	3	0	3	1	1	1	0	35	0	8	1	-	-	-	-	1	1,2,3,4,5,6,-11,-10,-9,-8,-7,12,13,14,15,16,17,18,19,20,21,22,23,24,25,26,27,36,37,38,39,40,41,42,43,44	1	1	1	2	0	0	0	0	0
JS736	9R	Lys-	Y	N	N	3	4	11	8635440	6324618	6255811	30102	196	38509	4	51.8391	30.1857	1016	0	967	967	49	0	0	0	2	0	0	2	0	36	0	7	1	-	-	-	-	1	1,2,3,4,5,6,7,8,9,10,12,13,14,15,16,17,18,19,20,21,22,23,24,25,26,27,28,35,36,37,38,39,40,41,42,43,44	2	2	0	0	0	0	0	0	0
JS737	9R	Lys-	Y	N	N	3	4	15	7520414	3563370	3524379	11826	140	27025	4	29.2049	11.9217	381	0	336	336	44	0	1	0	3	0	2	0	1	26	0	17	1	-	-	-	-	1	1,2,3,4,5,6,7,9,10,11,12,13,14,15,16,17,18,19,20,22,23,24,25,26,42,43,44	3	3	0	0	0	0	0	0	0
JS738	9R	Lys-	Y	N	N	3	4	18	7376938	3305192	3239453	14981	280	50478	3	26.8439	15.2044	574	0	475	475	94	0	5	0	7	2	2	3	0	38	0	5	1	-	-	-	-	1	1,2,3,4,5,6,7,8,9,10,-13,-12,14,15,16,17,18,19,20,21,-31,-30,-29,-27,-26,-25,-24,-23,-22,33,34,35,-38,39,40,41,42,43,44	4	4	3	6	0	0	0	0	0
JS739	9R	Lys-	Y	N	N	3	4	19	5156350	2430256	2400226	11437	108	18485	3	19.8896	11.5022	427	0	388	388	36	0	3	0	4	3	1	0	0	37	0	6	1	-	-	-	-	1	1,2,3,4,5,6,7,8,9,10,-11,12,13,14,15,16,17,18,19,20,21,22,23,24,25,26,29,30,31,36,37,38,39,40,41,42,43,44	2	2	1	2	0	0	0	0	0
JS602	9R	Met-	Y	N	N	2	2	12	11799268	4705108	4632063	27076	657	45312	4	38.3838	27.6302	1043	0	573	573	465	0	5	0	20	9	6	3	2	33	4	6	2	-	-	-	-	2	1,2,-11,3,4,40,-27,-26,-25,21,24,5,8,7,-10,-9,-6,-11,16,17,18,-39,-34,-33,-32,36,37,-31,-30,-29,-28,-20,-19,-18,-17,-16,-13,-12,41,42,43,44 1,2,-11,3,4,40,-27,-26,-25,21,24,5,8,7,-10,-9,-6,-11,16,17,18,19,20,28,29,30,31,-37,-36,32,33,34,39,-18,-17,-16,-13,-12,41,42,43,44	4	4	4	6	1	4	1	4	5
JS603	9R	Met-	Y	N	N	2	2	19	7627842	3609102	3550064	35746	426	22866	3	29.4178	36.0379	1303	0	1014	1014	286	0	3	0	21	7	8	4	2	10	28	5	6592	2651354	23881	166	95	2	1,2,3,4,5,6,-38,-37,-36,-30,-29,-28,-27,-26,-25,24,-23,-22,-21,-20,-19,-18,-17,-16,12,-11,-18,-17,-16,12,-11,-10,-9,-8,-7,40,41,-31,-30,-29,-28,2,3,4,-33,-32,-31,-30,-29,-28,37,36,-27,-26,-25,24,-23,-22,-20,-19,-18,-17,-16,-12,-11,-10,-9,-8,-7,39,40,41,42,43,44 1,2,3,4,5,6,-38,-37,-36,-30,-29,-28,-27,-26,-25,24,-23,-22,-21,-20,-19,-18,-17,-16,-12,-11,-10,-9,-8,-7,40,41,-31,-30,-29,-28,2,3,4,-33,-…	2	2	4	8	5	13	0	0	2
JS613	9R	Met-	Y	N	Y	3	2	1	9167912	4556174	4481592	32608	784	41190	4	37.1369	33.2682	990	0	472	472	517	0	1	0	28	7	14	4	3	16	12	15	132	5213592	34732	370	118	2	1,-2,-37,-36,-24,22,23,-4,3,-7,-10,-9,-8,-3,40,-33,-32,-34,-30,-29,-33,-32,-34,-30,-29,-33,-32,-34,-30,-29,-18,-17,-16,-12,-7,4,-1,-44,-43,-42,-41,-34,41,19,20,42,43,44 1,-4,7,12,16,17,18,29,30,34,32,33,29,30,34,32,33,29,30,34,32,33,-40,3,8,9,10,7,-3,4,-23,-22,24,36,37,2,-1,-44,-43,-42,-41,-34,41,19,20,42,43,44	8	8	2	4	2	9	2	11	3
JS617	9R	Met- Lys-	Y	N	N	3	2	23	6959280	3450288	3407116	27960	423	14789	2	28.2332	28.2778	842	0	538	538	300	0	4	0	23	11	7	4	1	10	18	15	15040	2908656	22146	147	84	2	1,-7,-6,-5,-4,-5,-10,-9,-4,-3,-2,-1,-44,-43,-42,38,39,-18,-17,-16,15,31,36,37,38,-25,-24,-23,-22,-21,-20,-19,-37,-36,-31,12,16,17,36,37,38,39,20,21,22,-25,-31,25,-22,23,24,39,42,43,44 1,2,3,4,9,10,5,4,5,6,7,-1,-44,-43,-42,38,39,-18,-17,-16,15,31,36,37,38,-25,-24,-23,-22,-21,-20,-19,-37,-36,-31,12,16,17,36,37,38,39,20,21,22,-25,-31,25,-22,23,24,39,42,43,44	6	6	1	2	2	13	5	20	1
JS709	9R	Lys-	Y	N	N	2	1	34	6361636	2937764	2873439	24444	670	39211	5	23.8109	25.0209	779	0	373	371	393	2	13	0	32	10	12	6	4	18	17	8	390	5862856	51358	637	194	3	1,3,-10,-9,-8,7,-3,4,-2,-6,-11,-6,-5,-4,19,20,24,25,26,27,28,-38,21,-22,-22,-20,-19,-15,-14,-12,11,-1,-44,-43,-42,38,-10,-9,-8,12,14,16,17,18,-40,-37,-31,-30,29,41,40,42,43,44 1,-11,12,14,15,19,20,22,22,-21,38,-28,-27,-26,-25,-24,-20,-19,4,5,6,11,6,2,-4,3,-7,8,9,10,-3,-1,-44,-43,-42,38,-10,-9,-8,12,14,16,17,18,-40,-37,-31,-30,29,41,40,42,43,44	4	4	3	5	3	11	5	21	3
JS712	9R	Lys-	Y	N	N	2	1	40	5617338	4061590	4015779	24845	241	20725	3	33.2769	24.993	813	0	683	683	126	0	4	0	6	4	0	2	0	36	2	5	2	-	-	-	-	2	1,2,3,4,5,6,7,8,9,10,12,13,14,15,16,17,18,19,20,-27,-26,-25,-24,-23,-22,-21,28,26,27,29,30,31,36,37,38,39,40,41,42,43,44 1,2,3,4,5,6,7,8,9,10,12,13,14,15,16,17,18,19,20,-27,-26,-28,21,22,23,24,25,26,27,29,30,31,36,37,38,39,40,41,42,43,44	2	2	1	1	0	0	1	4	0
JS720	9R	Lys-	Y	N	N	2	2	28	6653038	4812076	4724495	24671	305	62605	3	39.1497	24.8834	758	0	594	594	159	0	5	0	9	3	2	2	2	35	1	7	2	-	-	-	-	2	1,2,3,4,5,6,7,-41,-40,-39,-38,9,10,13,12,-26,-25,-24,-23,-22,-21,-20,-19,-18,-17,-16,-15,-14,-13,28,29,30,36,37,-8,42,43,44 1,2,3,4,5,6,7,-41,-40,-39,-38,9,10,13,14,15,16,17,18,19,20,21,22,23,24,25,26,-12,-13,28,29,30,36,37,-8,42,43,44	3	3	3	5	0	0	1	4	0
JS721	9R	Met- Lys-	Y	N	N	2	2	29	6176284	4504392	4463594	14574	309	25915	4	36.9878	14.8278	429	0	169	167	260	0	0	0	16	4	2	4	6	15	3	25	2	-	-	-	-	2	2,-6,36,7,12,-10,-9,7,7,16,17,19,20,22,23,-24,25,26,27,-8,-8,-6 2,-6,36,7,7,12,-10,-9,7,16,17,19,20,22,23,-24,25,26,27,-8,-8,-6	7	7	3	5	3	10	0	0	0
JS723	9R	Lys-	Y	N	N	3	1	7	6359866	4652000	4588125	38381	212	25282	3	38.0197	38.45	1191	0	1128	1128	60	0	3	0	3	1	1	1	0	10	22	11	2	-	-	-	-	2	1,2,3,4,5,6,7,8,9,10,11,12,13,14,15,16,17,18,19,20,21,22,23,24,25,26,27,-28,-25,-24,-23,-22,-21,-20,-19,-18,-17,-16,-15,-14,-13,-12,-11,-10,-9,-8,-7,-6,-5,-4,40,41,42,43,44 1,2,3,4,5,6,7,8,9,10,11,12,13,14,15,16,17,18,19,20,21,22,23,24,25,28,-27,-26,-25,-24,-23,-22,-21,-20,-19,-18,-17,-16,-15,-14,-13,-12,-11,-10,-9,-8,-7,-6,-5,-4,40,41,42,43,44	1	1	1	1	0	0	1	4	0
JS607	9R	Met-	Y	N	N	3	1	4	8399750	4051018	3964175	35573	674	50596	2	32.8493	36.1127	1325	0	993	993	309	0	23	0	18	10	4	3	1	14	26	3	312	2377080	17756	103	103	4	1,2,3,4,5,6,-39,-38,-37,-36,-35,-34,-33,-32,-31,-30,-27,-26,-25,-21,-20,-18,-17,-16,-15,-11,12,13,-10,-9,-8,-7,-8,4,5,-6,9,10,-11,16,17,18,19,20,21,-22,23,24,-27,-26,-25,-24,-23,22,32,33,34,35,36,37,38,39,40,41,42,43,44 1,2,3,4,5,6,-39,-38,-37,-36,-35,-34,-33,-32,-22,23,24,25,26,27,-24,-23,22,-21,-20,-19,-18,-17,-16,11,-10,-9,6,-5,-4,8,7,8,9,10,-13,-12,11,15,16,17,18,20,21,25,26,27,30,31,32,33,34…	2	2	2	4	4	15	4	16	1
JS614	9R	Met-	Y	N	N	3	2	6	6027524	2928990	2880643	32082	149	16116	3	23.8706	32.1115	1347	0	1305	1305	40	0	2	0	3	0	1	2	0	17	23	3	4	-	-	-	-	4	1,2,3,4,5,6,7,8,9,10,11,12,16,17,18,19,20,21,22,23,24,25,26,27,28,29,30,31,32,33,34,35,36,37,38,39,40,41,-40,-39,-38,-37,-36,-35,-34,-33,-32,-31,-30,-29,-28,-27,-26,-25,-24,-23,-22,-21,19,20,21,22,23,24,25,26,27,28,29,30,31,32,33,34,35,36,37,38,39,40,41,42,43,44 1,2,3,4,5,6,7,8,9,10,11,12,16,17,18,19,20,21,22,23,24,25,26,27,28,29,30,31,32,33,34,35,36,37,38,39,40,-41,-40,-39,-38,-37,-36,-35,-34,-3…	1	1	0	0	0	0	1	4	0
JS615	9R	Met- Lys-	Y	N	N	3	2	10	7049874	3315568	3260319	26889	208	28152	4	27.0168	26.9966	853	0	789	789	59	0	5	0	4	0	4	0	0	15	18	10	4	-	-	-	-	4	1,3,4,5,6,7,8,9,10,11,12,-11,-10,-9,-8,-7,-6,-5,-4,-3,-2,-1,-44,-43,-42,-41,-40,-39,-38,-37,-36,-30,-29,-28,-27,-26,-25,-24,-23,-22,-21,-20,-19,-18,36,37,38,39,40,41,42,43,44 1,3,4,5,6,7,8,9,10,11,12,-11,-10,-9,-8,-7,-6,-5,-4,-3,-2,-1,-44,-43,-42,-41,-40,-39,-38,-37,-36,18,19,20,21,22,23,24,25,26,27,28,29,30,36,37,38,39,40,41,42,43,44 1,3,4,5,6,7,8,9,10,11,-12,-11,-10,-9,-8,-7,-6,-5,-4,-3,-2,-1,-…	2	2	0	0	0	0	1	4	1
JS732	9R	Lys-	Y	N	N	3	4	4	8097608	5895786	5791187	68858	710	35031	4	47.9889	69.3102	2202	0	1735	1735	454	0	13	0	16	10	4	1	1	8	31	4	272	5222530	59290	240	267	4	1,2,3,4,5,6,7,7,8,9,10,7,8,9,10,14,15,16,17,18,19,20,21,22,23,24,25,28,39,-38,-37,-36,-31,-30,-29,-27,-26,-25,-24,-23,-22,-20,-19,-18,-17,-16,-15,-14,-13,-12,11,-6,-5,3,4,-1,-44,-43,-42,40,41,29,30,31,36,37,38,39,40,41,42,43,44 1,-4,-3,5,6,-11,12,13,14,15,16,17,18,19,20,22,23,24,25,26,27,29,30,31,36,37,38,-39,-28,-25,-24,-23,-22,-21,-20,-19,-18,-17,-16,-15,-14,-10,-9,-8,-7,-10,-9,-8,-7,-7,-6,-5,-…	1	1	2	3	3	11	4	16	1
JS734	9R	Lys-	Y	N	N	3	4	8	9793962	7225044	7150206	26841	331	47666	5	59.2505	27.0713	960	0	731	725	225	0	4	1	9	5	2	2	0	20	5	18	4	-	-	-	-	4	3,-2,4,5,6,-10,-9,-8,-7,-6,-5,-4,-15,-14,12,13,14,15,16,17,18,19,20,22,23,-27,-26,-25,-24,28 3,-2,4,5,6,7,8,9,10,-6,-5,-4,-15,-14,12,13,14,15,16,17,18,19,20,22,23,-27,-26,-25,-24,28 3,-2,4,5,6,7,8,9,10,-6,-5,-4,-15,-14,-13,-12,14,15,16,17,18,19,20,22,23,-27,-26,-25,-24,28 3,-2,4,5,6,-10,-9,-8,-7,-6,-5,-4,-15,-14,-13,-12,14,15,16,17,18,19,20,22,23,-27,-26,-25,-24,28	3	3	2	4	0	0	2	7	1
JS604	9R	Met-	Y	N	N	2	2	27	7650554	3983000	3939484	22909	252	20355	3	32.6447	23.0752	945	0	738	737	203	1	4	0	13	3	3	5	2	16	14	13	8	-	-	-	-	8	4,5,6,2,8,9,10,11,-7,-6,-5,-4,-18,-17,-16,-13,-12,-24,-23,-22,-21,-20,-19,-21,-33,-32,-31,-30,-29,-28,-27,-26,-25,3,19,20,21,22,23,24,12,13,16,17,18 4,5,6,2,8,9,10,11,-7,-6,-5,-4,-18,-17,-16,-13,-12,-24,-23,-22,-21,-20,-19,-3,25,26,27,28,29,30,31,32,33,21,19,20,21,22,23,24,12,13,16,17,18 4,5,6,2,8,9,10,11,-7,-6,-5,-4,-18,-17,-16,-13,-12,-24,-23,-22,-21,-20,-19,-21,-20,-19,-3,25,26,27,28,29,30,31,…	2	2	2	2	0	0	1	4	4
JS711	9R	Lys-	Y	N	N	2	1	39	5437680	3987386	3925742	43154	581	17909	3	32.5308	43.5729	1337	0	963	963	371	0	3	0	22	7	8	6	1	5	29	9	222	2586462	19987	170	107	3	1,-25,-24,-23,22,-20,-19,-18,-17,-16,-15,-14,-13,-1,-44,-43,-41,-40,-37,-36,-30,-29,-28,-26,-25,-24,-23,26,27,-23,26,27,-12,-11,-10,-9,-8,-7,11,-7,-6,-5,-4,-3,-6,-5,-4,-3,-2,22,-20,-19,-18,-17,-16,-15,-14,-13,-28,29,30,36,37,40,41,43,44 1,13,14,15,16,17,18,19,20,-22,23,24,25,-1,-44,-43,-41,-40,-37,-36,-30,-29,-28,-26,-25,-24,-23,26,27,-23,26,27,-12,-11,-10,-9,-8,-7,11,-7,-6,-5,-4,-3,-6,-5,-4,-3,-…	4	4	2	4	3	13	2	8	1
JS628	9R	Met-	Y	N	N	3	4	17	5630204	2459392	2410671	21267	240	27214	4	19.9761	21.4273	759	0	694	694	61	0	4	0	5	0	3	2	0	20	18	5	12	-	-	-	-	12	1,2,3,4,5,6,7,8,9,10,11,12,-11,-10,-9,-8,-7,-6,-5,-4,-3,-1,-44,-43,-42,-41,-40,-39,-38,-37,-36,18,19,20,21,22,23,24,25,26,27,28,29,30,31,32,33,34,35,36,37,38,39,40,40,40,41,42,43,44 1,3,4,5,6,7,8,9,10,11,12,-11,-10,-9,-8,-7,-6,-5,-4,-3,-2,-1,-44,-43,-42,-41,-40,-40,-39,-38,-37,-36,-35,-34,-33,-32,-31,-30,-29,-28,-27,-26,-25,-24,-23,-22,-21,-20,-19,-18,36,37,38,39,40,40,41,42,43,44 1,3,4,5,6,7,8,9…	1	1	0	0	0	1	1	4	1
JS706	9R	Met- Lys-	Y	N	Y	2	1	28	4427082	2064632	2038727	9197	137	16571	2	16.894	9.29941	295	0	224	224	69	0	2	0	9	4	2	3	0	19	7	17	12	-	-	-	-	12	1,2,3,-4,7,8,9,10,11,12,13,19,20,21,22,23,-24,25,26,36,37,38,19,21,22,23,24,25,26,27,41,42,43,44 1,2,3,-4,7,8,9,10,11,12,13,19,21,22,23,24,25,26,36,37,38,19,20,21,22,23,-24,25,26,27,41,42,43,44 1,2,3,-4,7,8,9,10,11,12,13,19,20,21,22,23,24,-23,-22,-21,-19,-38,-37,-36,-26,-25,24,25,26,27,41,42,43,44 1,2,3,-4,7,8,9,10,11,12,13,19,20,21,22,23,-24,-23,-22,-21,-19,-38,-37,-36,-26,-25,24,25,26,27,41,42,…	4	4	2	4	1	4	0	0	2
JS609	9R	Met-	Y	N	N	3	1	14	8526558	4162742	4094154	27940	558	40090	4	33.9264	28.3924	975	0	637	636	322	1	16	0	18	10	4	3	1	23	12	8	18	-	-	-	-	18	1,5,6,9,10,-11,7,8,9,10,11,5,6,12,16,17,18,19,20,21,24,25,26,29,30,31,-32,33,39,40,41,42,43,44,1,2,3,4,37,38,27,-27,-26,28,39,41,42,43,44 1,2,3,4,37,38,27,-27,-26,28,39,40,41,42,43,44,1,5,6,9,10,11,-10,-9,-8,-7,11,5,6,12,16,17,18,19,20,21,24,25,26,29,30,31,-32,33,39,41,42,43,44 1,2,3,4,37,38,27,-27,-26,28,39,40,41,42,43,44,1,5,6,9,10,-11,7,8,9,10,11,5,6,12,16,17,18,19,20,21,24,25,26,29,30,31,-32,…	3	3	2	4	3	11	1	5	2
JS705	9R	Lys-	Y	N	N	2	1	25	6547478	4881936	4802502	52217	270	26947	3	39.7962	52.2925	1768	0	1640	1638	120	0	8	0	6	2	2	2	0	9	24	10	36	-	-	-	-	36	2,3,4,5,6,7,8,9,10,11,12,13,14,15,16,17,18,19,20,21,22,-26,-25,-24,-23,-22,-20,-19,-18,-17,-16,-15,-14,-13,-12,-10,-9,-8,-7,-6,-5,-38,-37,-36,-31,-30,-29,-28,-27,-26,-25,-24,-23,-22,-21,-20,-19,-18,-17,-16,-15,-14,-13,-12,-11,-10,-9,-8,-7,-6,-5,-4,-3 2,3,4,5,6,7,8,9,10,11,12,13,14,15,16,17,18,19,20,21,22,23,24,25,26,-22,-20,-19,-18,-17,-16,-15,-14,-13,-12,-10,-9,-8,-7,-6,-5,-38,-37,-36,-31,-30,-2…	2	2	1	1	0	0	1	4	2
JS599	9R	Met-	Y	N	Y	2	2		8129356	4259306	4199074	39077	476	20679	3	34.7958	39.4064	1226	0	866	866	357	0	3	0	19	7	6	2	4	13	21	9	160	-	-	-	-	160	1,3,4,-7,8,9,10,11,8,9,10,12,19,20,-31,-30,-29,32,33,34,35,38,39,41,43,44,1,2,3,4,5,-6,-5,7,19,20,22,23,24,25,26,27,29,30,31,32,33,36,37,36,37,38,39,41,42,43,44 1,2,3,4,-7,8,9,10,11,8,9,10,12,19,20,-31,-30,-29,32,33,34,35,38,39,41,43,44,1,3,4,5,6,-5,7,19,20,22,23,24,25,26,27,29,30,31,32,33,36,37,36,37,38,39,41,42,43,44 1,3,4,-7,8,9,10,11,8,9,10,12,19,20,-31,-30,-29,32,33,36,37,36,37,38,39,41,43,4…	4	4	0	0	6	17	3	11	2
JS735	9R	Lys-	Y	N	Y	3	4	10	7676866	5818950	5729064	54552	927	34407	5	47.4741	55.2734	2163	0	1353	1350	800	0	10	0	33	10	10	11	2	3	23	17	1732332	-	-	-	-	1732332	-2,16,17,18,-11,19,20,21,22,25,26,27,-26,28,27,-26,-25,-22,-21,-20,-19,11,-18,-17,-16,-15,-14,-13,-12,-10,-9,-8,12,13,14,15,16,17,18,19,23,-24,25,26,-27,-28,29,-31,-30,-29,28,29,-31,-30,-29,28,27,-25,24,-23,-19,-18,-17,-16,-15,-14,-12,7,9,10,12,13,14,15	2	2	6	12	1	2	2	5	5
JS707	9R	Lys-	Y	N	N	2	1	31	6752866	3207820	3123263	55200	864	28493	3	25.8811	55.8562	1867	0	1341	1341	512	0	14	0	41	19	11	2	9	6	32	5	-	4712378	86378	578	361	48	1,2,3,4,5,6,7,8,9,10,11,8,9,10,11,-10,-8,28,36,-37,19,20,21,29,30,31,-18,-17,-16,-15,-14,-13,12,13,14,15,16,17,18,-31,-30,-29,-21,-20,-19,37,-36,-28,38,39,-23,-20,-19,-18,-17,-16,-11,-12,13,14,15,16,17,18,-31,-30,16,17,18,38,39,40,41,42,43,1,-38,-37,-36,-31,-30,-29,-28,-26,-25,-24,-23,-22,-20,-19,-18,-17,-16,-11,-12,11,15,14,15,16,17,18,-31,-30,-29,-21,-20,-19,37,-36,-31,-30,-29,-28,-26,-25,-24,-…	2	2	3	5	3	15	1	5	5
JS731	9R	Lys-	Y	N	N	3	4	1	11790068	8659266	8481815	129159	1555	46737	10	70.2849	130.23	4086	0	3090	3090	982	0	14	0	27	11	7	6	3	10	29	4	171072	4966128	70891	409	302	1	1,2,3,4,5,6,7,-13,-12,-1,-44,-43,-42,-41,-40,39,-38,-37,-36,8,9,11,14,15,16,17,19,20,21,-37,-36,19,20,14,15,16,-24,-23,-22,17,18,-31,-30,-29,-28,-27,-26,-25,-24,-23,-22,-21,-20,-19,-17,-16,-15,-14,-11,-10,-9,-8,36,37,38,17,19,20,21,22,23,24,25,26,27,29,30,31,-18,-17,22,23,24,-16,-15,-14,-20,-19,36,37,38,-39,40,41,42,43,44	1	1	4	7	0	0	4	13	3
JS272	6L	Met-	N	N	N				7804140	3835644	3796298	8452	49	30845	3	31.3597	27.8721	114	0	108	108	0	0	6	0	0	0	0	0	0	6	0	0	1	-	-	-	-	1	1,2,3,4,5,6	-	-	-	-	-	-	-	-	-
JS704	6L	Met-	N	Y	N	3	1	25	11306758	8234818	8164854	17829	104	52031	9	67.4466	58.7967	160	0	153	145	1	8	6	1	1	0	0	0	1	5	0	1	1	-	-	-	-	1	1,3,4,5,6	-	-	-	-	-	-	-	-	-
JS780	6L	Met-	Y	Y	N				5794256	4316978	4285573	1997	23	29385	8	35.4014	6.62295	8	0	1	1	2	0	5	2	1	0	0	0	1	2	0	4	1	-	-	-	-	1	1,6	-	-	-	-	-	-	-	-	-
JS781	6L	Met-	Y	Y	N				6004604	4333606	4296420	2091	43	35052	6	35.491	6.99672	27	0	0	0	4	0	23	1	1	0	0	0	1	2	0	4	1	-	-	-	-	1	1,6	-	-	-	-	-	-	-	-	-
JS782	6L	Met-	Y	Y	N				5470924	4001500	3860537	1913	28	139022	5	31.8904	6.36393	17	0	1	1	3	0	13	1	1	0	0	0	1	2	0	4	1	-	-	-	-	1	1,6	-	-	-	-	-	-	-	-	-
JS783	6L	Met-	Y	Y	N				5468506	4039900	3994474	1893	19	43514	3	32.9968	6.26885	6	0	0	0	2	0	4	0	1	0	0	0	1	2	0	4	1	-	-	-	-	1	1,6	-	-	-	-	-	-	-	-	-
LM001	9R&6L	-	N	N	N				5806000	4333170	4267075	35754	148	30193	2	35.4869	27.4329	1024	0	1018	1018	0	0	6	0	0	0	0	0	0	49	0	0	1	-	-	-	-	1	1-44, 1-6	-	-	-	-	-	-	-	-	-
LM002	9R&6L	-	N	N	N				8882212	6584886	6479892	54266	303	50425	4	53.8896	41.6965	1529	0	1519	1519	0	0	10	0	0	0	0	0	0	49	0	0	1	-	-	-	-	1	1-44, 1-6	-	-	-	-	-	-	-	-	-
LM003	9R&6L	-	N	N	N				10723772	7611284	7467454	61881	479	81470	8	62.1026	47.6496	1786	0	1765	1765	0	0	21	0	0	0	0	0	0	49	0	0	1	-	-	-	-	1	1-44, 1-6	-	-	-	-	-	-	-	-	-
LM004	9R&6L	-	N	N	N				9839050	7215716	7102487	58222	326	54681	7	59.0674	44.7368	1644	0	1627	1627	0	0	17	1	0	0	0	0	0	49	0	0	1	-	-	-	-	1	1-44, 1-6	-	-	-	-	-	-	-	-	-
BY4741	-	Met-	-	-	N				5872732	4299844	4246490	-	-	53354	3	34.9532	-	0	0	-	-	-	-	-	-	-	-	-	-	-	-	-	-	-	-	-	-	-	-	-	-	-	-	-	-	-	-	-	-
[truncated: 1 more columns]
