# Supplementary material for: SCRaMbLE generates designed combinatorial stochastic diversity in synthetic chromosomes
Source: Genome Res. 2016 Jan;26(1):36–49. doi: 10.1101/gr.193433.115 (PMC4691749; doi:10.1101/gr.193433.115)
Supplement: Supplemental Material [file supp_gr.193433.115_TableS2.xlsx]

## Sheet: Sheet1
segment	slow_del	slow_present	wt_del	wt_present	p_two	p_left	p_right
1	1	6	4	53	0.450836	0.911819	0.450836
2	0	7	0	57	1	1	1
3	1	6	1	56	0.208333	0.989583	0.208333
4	1	6	1	56	0.208333	0.989583	0.208333
5	3	4	1	56	0.00319496	0.999945	0.00319496
6	3	4	0	57	0.000840054	1	0.000840054
7	0	7	0	57	1	1	1
8	0	7	4	53	1	0.621695	1
9	0	7	0	57	1	1	1
10	0	7	0	57	1	1	1
11	3	4	11	46	0.170721	0.964222	0.170721
12	0	7	0	57	1	1	1
13	3	4	16	41	0.414573	0.890886	0.341523
14	5	2	26	31	0.249907	0.956655	0.18776
15	4	3	25	32	0.692018	0.856981	0.393254
16	2	5	6	51	0.208545	0.963625	0.208545
17	2	5	6	51	0.208545	0.963625	0.208545
18	3	4	4	53	0.0239584	0.998297	0.0239584
19	0	7	0	57	1	1	1
20	0	7	0	57	1	1	1
21	2	5	7	50	0.253344	0.948253	0.253344
22	0	7	2	55	1	0.791667	1
23	0	7	3	54	1	0.702285	1
24	0	7	0	57	1	1	1
25	1	6	2	55	0.297715	0.97043	0.297715
26	1	6	4	53	0.450836	0.911819	0.450836
27	1	6	9	48	1	0.700838	0.714913
28	4	3	17	40	0.204292	0.966477	0.15242
29	2	5	13	44	0.662344	0.798242	0.524066
30	2	5	15	42	1	0.730898	0.60492
31	4	3	26	31	0.696907	0.835532	0.428452
32	3	4	40	17	0.204292	0.15242	0.966477
33	3	4	39	18	0.220426	0.176998	0.958182
34	3	4	42	15	0.182164	0.109114	0.979423
35	5	2	43	14	1	0.565412	0.765353
36	1	6	16	41	0.664182	0.39508	0.898761
37	1	6	13	44	1	0.518908	0.839212
38	2	5	13	44	0.662344	0.798242	0.524066
39	3	4	12	45	0.340036	0.953427	0.201758
40	3	4	9	48	0.115255	0.980621	0.115255
41	1	6	8	49	1	0.746656	0.673338
42	1	6	5	52	0.515991	0.874939	0.515991
43	1	6	4	53	0.450836	0.911819	0.450836
