# Supplementary material for: SCRaMbLE generates designed combinatorial stochastic diversity in synthetic chromosomes
Source: Genome Res. 2016 Jan;26(1):36–49. doi: 10.1101/gr.193433.115 (PMC4691749; doi:10.1101/gr.193433.115)
Supplement: Supplemental Material [file supp_gr.193433.115_TableS3.xlsx]

## Sheet: statistical analysis
Junction Types				End Types					Junction Prob
Source	JunctionType	Count		Source	EndType	Count	EndProb		Source	JunctionType	Prob	Expected	PoissonLower	PoissonUpper	PoissonPvalue	Direction
Parental	CDS-CDS	0		Parental	CDS	40	0.465116		Parental	CDS-CDS	0.216333	9.30233	9.12119e-05	1	0.000182424	down
Parental	CDS-UTR	40		Parental	UTR	40	0.465116		Parental	CDS-UTR	0.432666	18.6047	0.999995	1.12076e-05	2.24151e-05	up
Parental	CDS-NC	0		Parental	NC	6	0.0697674		Parental	CDS-NC	0.0648999	2.7907	0.0613784	1	0.122757	down
Parental	UTR-UTR	0		Parental	Tot	86			Parental	UTR-UTR	0.216333	9.30233	9.12119e-05	1	0.000182424	down
Parental	UTR-NC	0							Parental	UTR-NC	0.0648999	2.7907	0.0613784	1	0.122757	down
Parental	NC-NC	3							Parental	NC-NC	0.0048675	0.209302	0.999932	0.00130725	0.00261449	up
Parental	Tot	43
Novel	CDS-CDS	156		Novel	CDS	529	0.517613		Novel	CDS-CDS	0.267923	136.909	0.950588	0.0583483	0.116697	up
Novel	CDS-UTR	193		Novel	UTR	436	0.426614		Novel	CDS-UTR	0.441642	225.679	0.0144499	0.987932	0.0288999	down
Novel	CDS-NC	24		Novel	NC	57	0.055773		Novel	CDS-NC	0.0577376	29.5039	0.179432	0.867451	0.358864	down
Novel	UTR-UTR	106			Tot	1022			Novel	UTR-UTR	0.182	93.002	0.916915	0.099327	0.198654	up
Novel	UTR-NC	31							Novel	UTR-NC	0.0475871	24.317	0.922916	0.107806	0.215612	up
Novel	NC-NC	1							Novel	NC-NC	0.00311063	1.58953	0.52832	0.795979	1.05664	down
Novel	Tot	511							Novel	Tot	1	511
									Based on Parental End Prob
Novel	CDS-CDS	156		Parental	CDS	40	0.465116		Novel	CDS-CDS	0.216333	110.546	0.999982	2.66086e-05	5.32171e-05	up
Novel	CDS-UTR	193		Parental	UTR	40	0.465116		Novel	CDS-UTR	0.432666	221.092	0.0297165	0.974727	0.059433	down
Novel	CDS-NC	24		Parental	NC	6	0.0697674		Novel	CDS-NC	0.0648999	33.1639	0.060834	0.959136	0.121668	down
Novel	UTR-UTR	106			Tot	86			Novel	UTR-UTR	0.216333	110.546	0.355223	0.679993	0.710447	down
Novel	UTR-NC	31							Novel	UTR-NC	0.0648999	33.1639	0.396624	0.66986	0.793247	down
Novel	NC-NC	1							Novel	NC-NC	0.0048675	2.48729	0.289916	0.916865	0.579831	down
Novel	Tot	511							Novel	Tot	1	511

## Sheet: junctions statistics per strain
Strain	CDS-CDS	CDS-NC	CDS-UTR	NC-NC	NC-UTR	UTR-UTR	Total Novel Junctions
JS274	1	0	1	0	0	1	3
JS571	3	1	1	0	1	2	8
JS599	5	2	7	0	2	2	18
JS601	2	0	1	0	0	0	3
JS602	6	1	9	0	1	3	20
JS603	6	1	6	0	1	3	17
JS604	2	1	2	0	1	4	10
JS605	0	0	1	0	1	0	2
JS606	1	0	7	0	0	2	10
JS607	4	1	9	0	0	3	17
JS608	1	0	3	0	0	1	5
JS609	4	1	10	0	0	3	18
JS610	1	0	2	0	0	0	3
JS611	1	0	0	0	0	1	2
JS612	2	0	1	0	0	2	5
JS613	10	0	6	0	3	4	23
JS614	1	0	0	0	0	2	3
JS615	4	0	0	0	0	0	4
JS617	6	1	10	0	0	4	21
JS618	2	0	0	0	0	2	4
JS621	0	1	2	0	0	0	3
JS622	3	0	1	0	0	2	6
JS623	1	0	2	0	0	1	4
JS624	3	0	1	0	0	2	6
JS625	0	0	1	0	0	0	1
JS626	2	0	1	0	0	2	5
JS627	1	0	1	0	0	0	2
JS628	3	0	0	0	0	1	4
JS629	0	0	1	0	0	1	2
JS705	2	0	2	0	0	2	6
JS706	2	0	4	0	0	3	9
JS707	7	2	12	0	2	1	24
JS708	1	0	1	0	0	0	2
JS709	11	0	10	0	4	6	31
JS710	8	3	5	1	1	4	22
JS711	6	1	6	0	0	4	17
JS712	0	0	4	0	0	2	6
JS713	0	1	0	0	1	2	4
JS714	0	0	1	0	0	0	1
JS715	2	1	1	0	1	1	6
JS716	0	0	1	0	0	0	1
JS717	1	0	0	0	0	0	1
JS718	0	0	1	0	0	0	1
JS719	3	0	2	0	0	1	6
JS720	2	1	3	0	1	2	9
JS721	2	3	4	0	3	4	16
JS722	4	0	2	0	0	2	8
JS723	1	0	1	0	0	1	3
JS724	2	0	1	0	1	2	6
JS725	1	0	0	0	1	0	2
JS726	2	0	5	0	0	0	7
JS727	1	0	5	0	0	0	6
JS728	1	1	0	0	1	0	3
JS729	1	0	3	0	0	1	5
JS730	0	0	0	0	0	2	2
JS731	4	1	7	0	1	3	16
JS732	4	0	9	0	1	1	15
JS733	1	0	1	0	0	1	3
JS734	2	0	5	0	0	2	9
JS735	5	0	6	0	2	6	19
JS736	0	0	0	0	0	2	2
JS737	2	0	0	0	1	0	3
JS738	2	0	2	0	0	3	7
JS739	1	0	3	0	0	0	4
	156	24	193	1	31	106	511
