# Supplementary material for: SCRaMbLE generates designed combinatorial stochastic diversity in synthetic chromosomes
Source: Genome Res. 2016 Jan;26(1):36–49. doi: 10.1101/gr.193433.115 (PMC4691749; doi:10.1101/gr.193433.115)
Supplement: Supplemental Material [file supp_gr.193433.115_TableS4.xlsx]

## Sheet: MARKERS ANALYSIS BY JUNCTION-1
				MET-Junction					LYS-Junction
ID	Phenotype	Lys Status	Met Status	MET_ALL	Native UTR	Non Native UTR	CDS	NC	LYS_ALL	Native UTR	Non Native UTR	CDS	NC
JS602	Met-	Lys+	Met-	0	0	0	0	0	1	0	0	1	0
JS606	Met-	Lys+	Met-	0	0	0	0	0	1	0	0	1	0
JS609	Met-	Lys+	Met-	0	0	0	0	0	1	0	0	1	0
JS613	Met-	Lys+	Met-	0	0	0	0	0	3	0	0	3	0
JS599	Met-	Lys+	Met-	0	0	0	0	0	2	1	0	1	0
JS603	Met-	Lys+	Met-	0	0	0	0	0	1	1	0	0	0
JS604	Met-	Lys+	Met-	0	0	0	0	0	1	1	0	0	0
JS605	Met-	Lys+	Met-	0	0	0	0	0	1	1	0	0	0
JS607	Met-	Lys+	Met-	0	0	0	0	0	2	1	0	1	0
JS610	Met-	Lys+	Met-	0	0	0	0	0	1	1	0	0	0
JS611	Met-	Lys+	Met-	0	0	0	0	0	1	1	0	0	0
JS612	Met-	Lys+	Met-	0	0	0	0	0	1	1	0	0	0
JS622	Met-	Lys+	Met-	0	0	0	0	0	1	1	0	0	0
JS623	Met-	Lys+	Met-	0	0	0	0	0	1	1	0	0	0
JS625	Met-	Lys+	Met-	0	0	0	0	0	1	1	0	0	0
JS626	Met-	Lys+	Met-	0	0	0	0	0	1	1	0	0	0
JS627	Met-	Lys+	Met-	0	0	0	0	0	1	1	0	0	0
JS628	Met-	Lys+	Met-	0	0	0	0	0	1	1	0	0	0
JS629	Met-	Lys+	Met-	0	0	0	0	0	1	1	0	0	0
JS709	Lys-	Lys-	Met+	2	0	0	2	0	0	0	0	0	0
JS274	Met- Lys-	Lys-	Met-	0	0	0	0	0	1	1	0	0	0
JS571	Met- Lys-	Lys-	Met-	0	0	0	0	0	0	0	0	0	0
JS601	Met- Lys-	Lys-	Met-	0	0	0	0	0	0	0	0	0	0
JS608	Met- Lys-	Lys-	Met-	0	0	0	0	0	0	0	0	0	0
JS615	Met- Lys-	Lys-	Met-	0	0	0	0	0	0	0	0	0	0
JS617	Met- Lys-	Lys-	Met-	0	0	0	0	0	0	0	0	0	0
JS618	Met- Lys-	Lys-	Met-	0	0	0	0	0	0	0	0	0	0
JS621	Met- Lys-	Lys-	Met-	0	0	0	0	0	0	0	0	0	0
JS624	Met- Lys-	Lys-	Met-	0	0	0	0	0	0	0	0	0	0
JS706	Met- Lys-	Lys-	Met-	0	0	0	0	0	0	0	0	0	0
JS721	Met- Lys-	Lys-	Met-	0	0	0	0	0	0	0	0	0	0
JS710	Lys-	Lys-	Met+	7	0	0	7	0	0	0	0	0	0
JS715	Lys-	Lys-	Met+	1	0	0	1	0	0	0	0	0	0
JS719	Lys-	Lys-	Met+	1	0	0	1	0	0	0	0	0	0
JS726	Lys-	Lys-	Met+	1	0	1	0	0	0	0	0	0	0
JS727	Lys-	Lys-	Met+	1	0	1	0	0	0	0	0	0	0
JS731	Lys-	Lys-	Met+	4	0	0	4	0	0	0	0	0	0
JS738	Lys-	Lys-	Met+	1	0	1	0	0	0	0	0	0	0
JS096	-	Lys+	Met+	1	1	0	0	0	1	1	0	0	0
JS708	Lys-	Lys-	Met+	1	1	0	0	0	0	0	0	0	0
JS712	Lys-	Lys-	Met+	1	1	0	0	0	0	0	0	0	0
JS713	Lys-	Lys-	Met+	1	1	0	0	0	0	0	0	0	0
JS714	Lys-	Lys-	Met+	1	1	0	0	0	0	0	0	0	0
JS716	Lys-	Lys-	Met+	1	1	0	0	0	0	0	0	0	0
JS717	Lys-	Lys-	Met+	1	1	0	0	0	0	0	0	0	0
JS718	Lys-	Lys-	Met+	1	1	0	0	0	0	0	0	0	0
JS720	Lys-	Lys-	Met+	1	1	0	0	0	0	0	0	0	0
JS722	Lys-	Lys-	Met+	1	1	0	0	0	0	0	0	0	0
JS724	Lys-	Lys-	Met+	1	1	0	0	0	0	0	0	0	0
JS725	Lys-	Lys-	Met+	1	1	0	0	0	0	0	0	0	0
JS728	Lys-	Lys-	Met+	1	1	0	0	0	0	0	0	0	0
JS729	Lys-	Lys-	Met+	2	1	1	0	0	0	0	0	0	0
JS730	Lys-	Lys-	Met+	1	1	0	0	0	0	0	0	0	0
JS732	Lys-	Lys-	Met+	2	1	1	0	0	0	0	0	0	0
JS733	Lys-	Lys-	Met+	1	1	0	0	0	0	0	0	0	0
JS734	Lys-	Lys-	Met+	2	1	1	0	0	0	0	0	0	0
JS736	Lys-	Lys-	Met+	1	1	0	0	0	0	0	0	0	0
JS737	Lys-	Lys-	Met+	1	1	0	0	0	0	0	0	0	0
JS739	Lys-	Lys-	Met+	1	1	0	0	0	0	0	0	0	0
JS094	Lys-	Lys-	Met+	1	1	0	0	0	1	1	0	0	0
JS711	Lys-	Lys-	Met+	2	2	0	0	0	0	0	0	0	0
JS723	Lys-	Lys-	Met+	2	2	0	0	0	0	0	0	0	0
JS705	Lys-	Lys-	Met+	3	3	0	0	0	0	0	0	0	0
JS707	Lys-	Lys-	Met+	4	3	1	0	0	0	0	0	0	0
JS614	Met-	Lys+	Met-	0	0	0	0	0	3	3	0	0	0
JS735	Lys-	Lys-	Met+	4	3	0	1	0	0	0	0	0	0
Note:JS274 derived from JS94
JS94 genotype: MATa SynIXR-LEU2 IXΔR::URA3 his3Δ1 leu2Δ0 lys2Δ0 MET15 ura3Δ0
JS274 genotype for Jessica's strain collection (NOT scrambling):
JS274 genotype: synIXR-LEU2 (circular) IXΔR::URA3 his3Δ1 leu2Δ0 lys2Δ0 MET15 ura3Δ0 ho::CRE-EBD-kanMX

## Sheet: MARKERS ANALYSIS BY JUNCTION-2
MET-Junction
ID	Junction	Junction Type	MET
JS94	13R/14L	MET-Native UTR	CDS_MET28	UTR_MET28
JS96	13R/14L	MET-Native UTR	CDS_MET28	UTR_MET28
JS708	13R/14L	MET-Native UTR	CDS_MET28	UTR_MET28
JS710	14L/25L	MET-CDS	CDS_MET28	CDS_DAL1
JS710	11R/14L	MET-CDS	CDS_MET28	CDS_YIR014W
JS710	25L/14L	MET-CDS	CDS_MET28	CDS_DAL1
JS710	18R/14L	MET-CDS	CDS_MET28	CDS_YIR020W-A
JS710	11R/14L	MET-CDS	CDS_MET28	CDS_YIR014W
JS710	25L/14L	MET-CDS	CDS_MET28	CDS_DAL1
JS710	18R/14L	MET-CDS	CDS_MET28	CDS_YIR020W-A
JS713	14L/13R	MET-Native UTR	CDS_MET28	UTR_MET28
JS714	13R/14L	MET-Native UTR	CDS_MET28	UTR_MET28
JS715	12R/14L	MET-CDS	CDS_MET28	CDS_YIR016W
JS716	13R/14L	MET-Native UTR	CDS_MET28	UTR_MET28
JS717	13R/14L	MET-Native UTR	CDS_MET28	UTR_MET28
JS718	13R/14L	MET-Native UTR	CDS_MET28	UTR_MET28
JS719	12R/14L	MET-CDS	CDS_MET28	CDS_YIR016W
JS722	14L/13R	MET-Native UTR	CDS_MET28	UTR_MET28
JS724	13R/14L	MET-Native UTR	CDS_MET28	UTR_MET28
JS725	13R/14L	MET-Native UTR	CDS_MET28	UTR_MET28
JS726	13L/14L	MET-Non Native UTR	CDS_MET28	UTR_YIR016W
JS727	13L/14L	MET-Non Native UTR	CDS_MET28	UTR_YIR016W
JS728	14L/13R	MET-Native UTR	CDS_MET28	UTR_MET28
JS729	10L/14L	MET-Non Native UTR	CDS_MET28	UTR_MSL1
JS729	13R/14L	MET-Native UTR	CDS_MET28	UTR_MET28
JS730	13R/14L	MET-Native UTR	CDS_MET28	UTR_MET28
JS733	13R/14L	MET-Native UTR	CDS_MET28	UTR_MET28
JS736	13R/14L	MET-Native UTR	CDS_MET28	UTR_MET28
JS737	13R/14L	MET-Native UTR	CDS_MET28	UTR_MET28
JS738	12L/14L	MET-Non Native UTR	CDS_MET28	UTR_YIR014W
JS739	13R/14L	MET-Native UTR	CDS_MET28	UTR_MET28
JS709	14L/12R	MET-CDS	CDS_MET28	CDS_YIR016W
JS709	12R/14L	MET-CDS	CDS_MET28	CDS_YIR016W
JS712	13R/14L	MET-Native UTR	CDS_MET28	UTR_MET28
JS720	14L/13R	MET-Native UTR	CDS_MET28	UTR_MET28
JS723	13R/14L	MET-Native UTR	CDS_MET28	UTR_MET28
JS723	14L/13R	MET-Native UTR	CDS_MET28	UTR_MET28
JS732	10R/14L	MET-Non Native UTR	CDS_MET28	UTR_GAT4
JS732	14L/13R	MET-Native UTR	CDS_MET28	UTR_MET28
JS734	14L/12L	MET-Non Native UTR	CDS_MET28	UTR_YIR014W
JS734	13R/14L	MET-Native UTR	CDS_MET28	UTR_MET28
JS711	14L/13R	MET-Native UTR	CDS_MET28	UTR_MET28
JS711	14L/13R	MET-Native UTR	CDS_MET28	UTR_MET28
JS705	13R/14L	MET-Native UTR	CDS_MET28	UTR_MET28
JS705	14L/13R	MET-Native UTR	CDS_MET28	UTR_MET28
JS705	14L/13R	MET-Native UTR	CDS_MET28	UTR_MET28
JS735	14L/13R	MET-Native UTR	CDS_MET28	UTR_MET28
JS735	13R/14L	MET-Native UTR	CDS_MET28	UTR_MET28
JS735	14L/12R	MET-CDS	CDS_MET28	CDS_YIR016W
JS735	13R/14L	MET-Native UTR	CDS_MET28	UTR_MET28
JS731	11R/14L	MET-CDS	CDS_MET28	CDS_YIR014W
JS731	20R/14L	MET-CDS	CDS_MET28	CDS_DAL81
JS731	14L/11R	MET-CDS	CDS_MET28	CDS_YIR014W
JS731	14L/20R	MET-CDS	CDS_MET28	CDS_DAL81
JS707	14L/13R	MET-Native UTR	CDS_MET28	UTR_MET28
JS707	13R/14L	MET-Native UTR	CDS_MET28	UTR_MET28
JS707	13R/14L	MET-Native UTR	CDS_MET28	UTR_MET28
JS707	15R/14L	MET-Non Native UTR	CDS_MET28	UTR_YIR018C-A
LYS-Junction
ID	Junction	Junction Type	LYS1
JS94	31R/32L	LYS-Native UTR	CDS_LYS1	UTR_LYS1
JS96	31R/32L	LYS-Native UTR	CDS_LYS1	UTR_LYS1
JS274	31R/32L	LYS-Native UTR	CDS_LYS1	UTR_LYS1
JS605	31R/32L	LYS-Native UTR	CDS_LYS1	UTR_LYS1
JS606	30R/32L	LYS-CDS	CDS_LYS1	CDS_MGA2
JS610	31R/32L	LYS-Native UTR	CDS_LYS1	UTR_LYS1
JS611	32L/31R	LYS-Native UTR	CDS_LYS1	UTR_LYS1
JS612	31R/32L	LYS-Native UTR	CDS_LYS1	UTR_LYS1
JS622	32L/31R	LYS-Native UTR	CDS_LYS1	UTR_LYS1
JS623	31R/32L	LYS-Native UTR	CDS_LYS1	UTR_LYS1
JS625	31R/32L	LYS-Native UTR	CDS_LYS1	UTR_LYS1
JS626	32L/31R	LYS-Native UTR	CDS_LYS1	UTR_LYS1
JS627	31R/32L	LYS-Native UTR	CDS_LYS1	UTR_LYS1
JS629	31R/32L	LYS-Native UTR	CDS_LYS1	UTR_LYS1
JS602	32L/36L	LYS-CDS	CDS_LYS1	CDS_GTT1
JS603	32L/31R	LYS-Native UTR	CDS_LYS1	UTR_LYS1
JS613	32L/34R	LYS-CDS	CDS_LYS1	CDS_HYR1
JS613	32L/34R	LYS-CDS	CDS_LYS1	CDS_HYR1
JS613	32L/34R	LYS-CDS	CDS_LYS1	CDS_HYR1
JS607	32L/31R	LYS-Native UTR	CDS_LYS1	UTR_LYS1
JS607	22R/32L	LYS-CDS	CDS_LYS1	CDS_MND2
JS614	31R/32L	LYS-Native UTR	CDS_LYS1	UTR_LYS1
JS614	32L/31R	LYS-Native UTR	CDS_LYS1	UTR_LYS1
JS614	31R/32L	LYS-Native UTR	CDS_LYS1	UTR_LYS1
JS604	32L/31R	LYS-Native UTR	CDS_LYS1	UTR_LYS1
JS628	31R/32L	LYS-Native UTR	CDS_LYS1	UTR_LYS1
JS609	32L/33L	LYS-CDS	CDS_LYS1	CDS_YIR035C
JS599	29L/32L	LYS-CDS	CDS_LYS1	CDS_DAL7
JS599	31R/32L	LYS-Native UTR	CDS_LYS1	UTR_LYS1

## Sheet: MARKERS ANALYSIS BY STRAIN
Junction Type of MET	# of strain
MET - Native UTR	27
MET - Non Native UTRa	7
MET - CDSb	6
MET - NC	0
MET absent	31
Junction Type of LYS	# of strain
LYS - Native UTR	19
LYS - Non Native UTR	0
LYS - CDSc	6
LYS - NC	0
LYS absent	43
a: including strains with wild-type junction(JS729 JS732 JS734 JS707)
b: including strains with wild-type junction(JS735)
c: including strains with wild-type junction(JS607 JS599)

## Sheet: MET STRAINS
Strain	MET-Non Native UTR		Strain	MET-CDS
JS707#	YIR018C-A		JS709	YIR016W
JS726	YIR016W		JS710	DAL1 YIR014W YIR020W-A
JS727	YIR016W		JS715	YIR016W
JS729#	MSL1		JS719	YIR016W
JS732#	GAT4		JS731	YIR014W DAL81
JS734#	YIR014W		JS735#	YIR016W
JS738	YIR014W
#:strains with MET-Native UTR junction

## Sheet: LYS STRAINS
Strain	LYS-CDS
JS599#	DAL7
JS602	GTT1
JS606	MGA2
JS607#	MND2
JS609	YIR035C
JS613	HYR1
#:strains with LYS-Native UTR junction
