# Supplementary material for: SCRaMbLE generates designed combinatorial stochastic diversity in synthetic chromosomes
Source: Genome Res. 2016 Jan;26(1):36–49. doi: 10.1101/gr.193433.115 (PMC4691749; doi:10.1101/gr.193433.115)
Supplement: Supplemental Material [file supp_gr.193433.115_TableS5.xlsx]

## Sheet: Sheet1
Sample	Colony No.	ΔΔCT	Copy Number
JS606	1	1.72625	3
JS606	2	2.08114	4
JS606	3	2.37251	5
JS606	4	3.85749	14
JS606	5	1.80074	3
JS606	6	1.40896	3
JS606	7	1.52096	3
JS606	8	1.46484	3
JS606	9	1.77612	3
JS606	10	2.30246	5
JS606	11	2.0312	4
